# Supplementary material
Source: PubMed Central journal article supplement (PMC3158209)
Supplement: 1107172108_pnas.201107172SI.pdf [file 1107172108_pnas.201107172SI.pdf]

# Supporting Information

Barber et al. 10.1073/pnas.1107172108

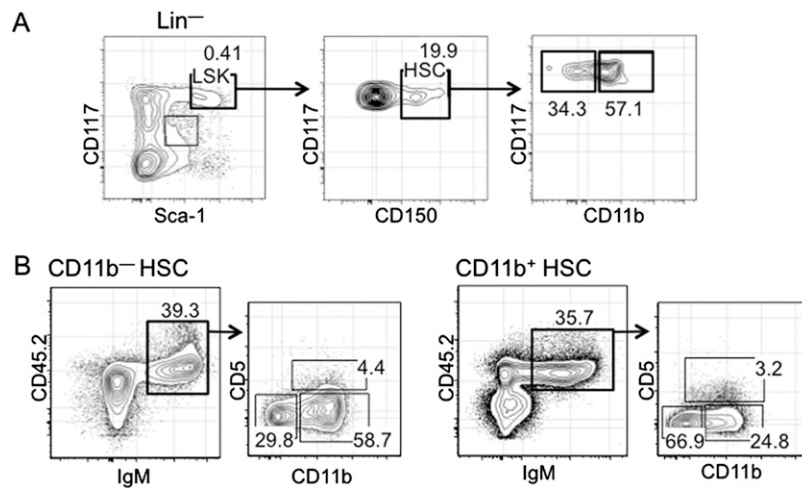

**Fig. S1.** CD11b expression does not segregate with B-1 progenitor potential in hematopoietic stem cells (HSCs). (A) Representative FACS strategy used to isolate CD11b<sup>+</sup> and CD11b<sup>-</sup> CD150<sup>+</sup> HSCs. The frequency of lineage negative (Lin<sup>-</sup>) Sca-1<sup>+</sup> c-kit<sup>+</sup> (LSK) cells in total bone marrow is indicated in *Left*. The LSK cells were gated according to the phenotypes shown in *Center* and *Right*. (B) CD11b<sup>+</sup> and CD11b<sup>-</sup> HSCs from 15-wk-old adult mice were purified and injected in vivo into CD45.1 Rag2<sup>-/-</sup> mice that were preconditioned with 500 R from a 137Cs irradiator (120 R/min, Mark I-68A; JL Shepherd and Associates) 24 h earlier. Production of donor CD45.2<sup>+</sup> slgM<sup>high</sup> CD11b<sup>+</sup> CD5<sup>+</sup> B-1a and slgM<sup>high</sup> CD11b<sup>+</sup> CD5<sup>-</sup> B-1b cells in the peritoneal cavity was evaluated 6 wk later. The frequency of cells within individual gates is indicated on the plots.

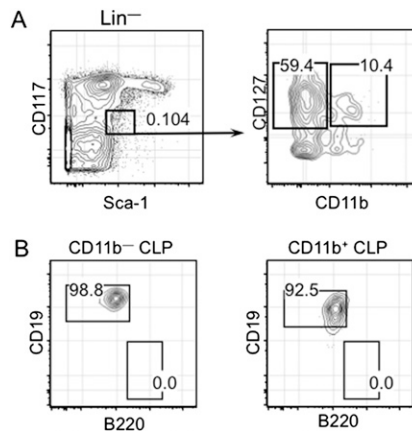

**Fig. S2.** CD11b expression does not segregate with B-1 progenitor potential in lymphoid progenitors (CLPs). (A) Representative FACS strategy used to isolate CD11b<sup>+</sup> and CD11b<sup>-</sup> CLPs. The frequency of LSK cells in total bone marrow is indicated in *Left*. The LSK cells were also gated according to the phenotype shown in *Right*. (B) CD11b<sup>+</sup> and CD11b<sup>-</sup> CLPs from 2.5-wk-old neonates generate B-1 progenitors in clonal cultures. Single CLPs were deposited into wells of 96-well microtiter plates by the automatic cell deposition unit on a FACSaria (Becton-Dickinson). Cells were cultured in RPMI 1640, 10% FCS, 5 × 10<sup>-5</sup> M 2-β-mercaptoethanol, 1 mM L-glutamine, 100 U/mL streptomycin, 100 μg/mL penicillin, 50 μg/mL gentamycin, 20 ng/mL IL-3, 20 ng/mL IL-6, 20 ng/mL SCF, 20 ng/mL Flt-3 ligand, and 20 ng/mL IL-7 (Biosource International) for 4–6 d in a humidified incubator at 37 °C and 5% CO<sub>2</sub>/air. Cells were then harvested and tested for their B-1 progenitor phenotype by immunostaining and analysis with the high-throughput sampler 96-well plate adapter for the BD LSR II flow cytometer. A total of 145 and 292 individual cells were tested for CD11b<sup>-</sup> and CD11b<sup>+</sup> CLP, respectively.
